# Supplementary material
Source: Springer Nature journal article supplement (https://www.springermedizin.de/resource/supplementary/12958_2005_288_MOESM3_ESM.pdf/9567664)

## PGMRC1

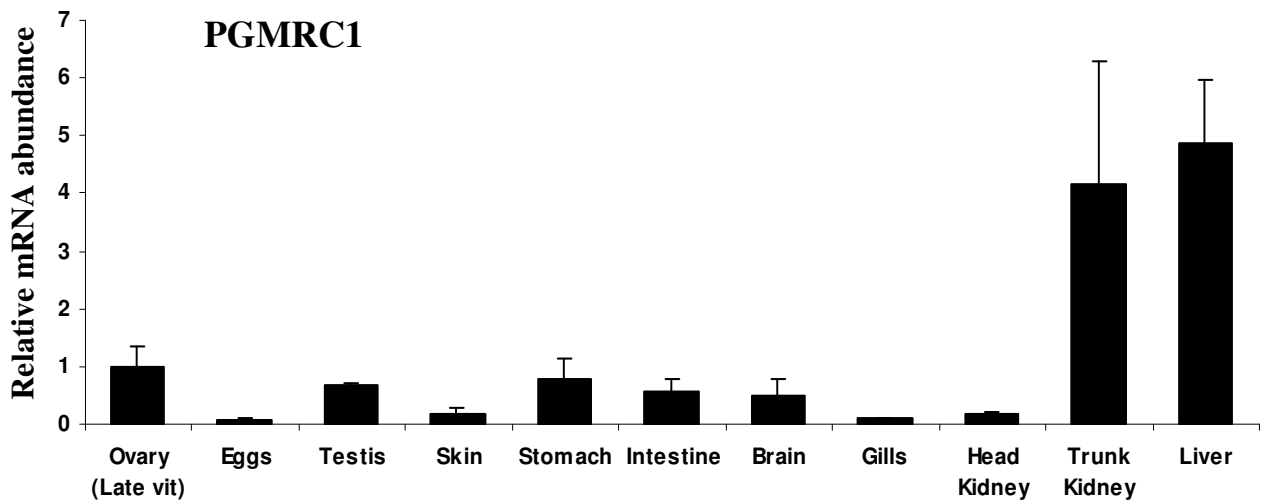

## mPR $\beta$

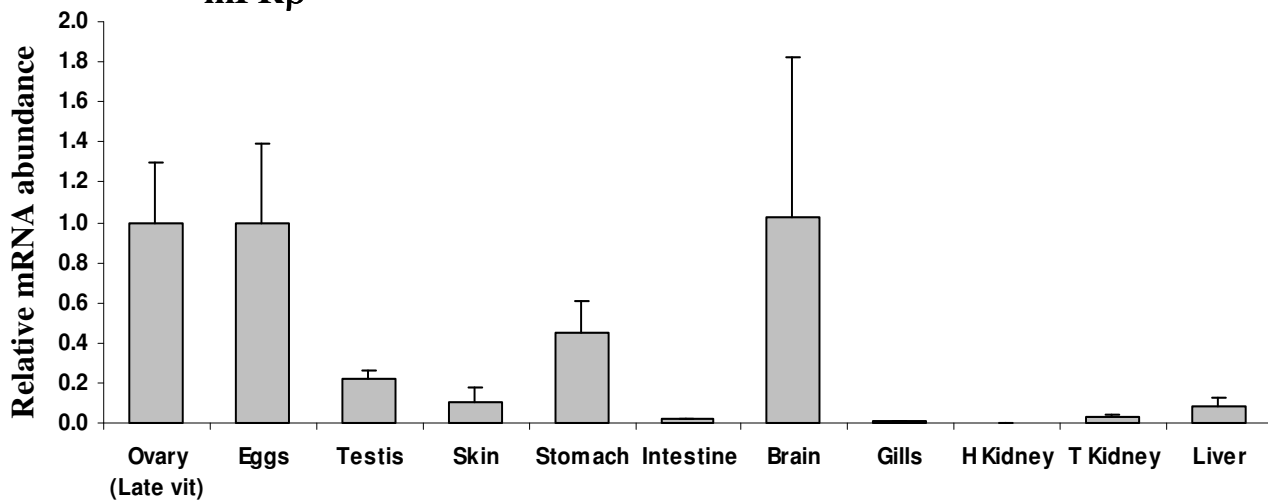

Supplement: MOESM3 [file 9567664]
